# Supplementary material for: Predicting Cancer Drug Response In Vivo by Learning an Optimal Feature Selection of Tumour Molecular Profiles
Source: Biomedicines. 2021 Sep 26;9(10):1319. doi: 10.3390/biomedicines9101319 (PMC8533095; doi:10.3390/biomedicines9101319)
Supplement: Supplementary file 1 [file biomedicines-09-01319-s001.zip › Supplementary Table.xlsx]

## Sheet: PDXs_by_treatment_BRCA
Treatments	S	R	T	Reponse Rate (S/T)
BGJ398	14	24	38	0.37
BKM120	30	8	38	0.79
BYL719	24	14	38	0.63
BYL719 + LJM716	33	5	38	0.87
CGM097	12	26	38	0.32
CLR457	27	11	38	0.71
HDM201	14	24	38	0.37
INC424	14	23	37	0.38
LEE011	23	15	38	0.61
LKA136	12	26	38	0.32
LLM871	23	15	38	0.61
binimetinib	22	16	38	0.58
paclitaxel	26	12	38	0.68
Legend
S	Number of Sensitive PDXs for the corresponding treatment
R	Number of Resistant PDXs for the corresponding treatment
T	Total number of PDXs tested against the corresponding treatment

## Sheet: PDXs_by_treatment_CRC
Treatments	S	R	T	Reponse Rate (S/T)
BKM120	25	14	39	0.36
BYL719	26	15	41	0.37
BYL719 + LJM716	27	12	39	0.31
CGM097	11	25	36	0.69
CLR457	28	12	40	0.3
HDM201	12	27	39	0.69
LEE011	24	17	41	0.41
LKA136	14	25	39	0.64
binimetinib	27	14	41	0.34
cetuximab	16	24	40	0.6
CKX620	29	9	38	0.24
encorafenib	12	28	40	0.7
LFW527 + binimetinib	16	15	31	0.48
Legend
S	Number of Sensitive PDXs for the corresponding treatment
R	Number of Resistant PDXs for the corresponding treatment
T	Total number of PDXs tested against the corresponding treatment

## Sheet: single-gene_markers
ID	Treatment_Name	S	T	Reponse Rate (S/T)	MCC	PR	RC	Nresp	Marker gene	p-value	Effect size (phi)	#Mutated	Mutation prevalence
BRCA
1	BGJ398	14	38	0.368421	0.477295	0.611111	0.785714	18	KIF20B	0.00627624	0.477295	18	0.473684
2	BKM120	30	38	0.789474	-0.775132	0.222222	0.0666667	9*	CCDC66	0.163814	0.266667	8	0.210526
3	BYL719	24	38	0.631579	-0.0952381	0.571429	0.333333	14*	KIF20B	0.0204501	0.396788	18	0.473684
5	BYL719 + LJM716	33	38	0.868421	0.0370823	0.882353	0.454545	17*	ANKRD36	0.046332	0.389249	19	0.5
6	CGM097	12	38	0.315789	-0.111687	0	0	1*	VWF	0.00670595	0.504878	4	0.105263
7	CLR457	27	38	0.710526	-0.678401	0	0	6	AVEN	0.153866	0.276385	6	0.157895
8	HDM201	14	38	0.368421	0.308607	1	0.142857	2*	ADAMTS7	0.00398851	0.509647	5	0.131579
9	INC424	14	37	0.378378	0.0599467	0.5	0.0714286	2*	PCDHB7	0.00459283	0.506652	5	0.135135
10	LEE011	23	38	0.605263	-0.481999	0	0	5*	MUC6	0.0633978	0.349689	6	0.157895
15	LKA136	12	38	0.315789	0.220998	0.666667	0.166667	3*	TLK2	0.00196636	0.553421	7	0.184211
16	LLM871	23	38	0.605263	0.383751	1	0.304348	7	EP400	0.029057	0.383751	7	0.184211
17	binimetinib	22	38	0.578947	0.244318	0.681818	0.681818	22*	PABPC3	0.0201131	0.426401	19	0.5
18	paclitaxel	26	38	0.684211	-0.820008	0	0	9*	HYDIN	0.0385179	0.350823	8	0.210526
CRC				0.184211	-0.0781209	0	0	1	INTS2	0.00414889	0.61611	3	0.0789474
2	BKM120	25	39	0.641026	-0.224457	0.444444	0.16	9*	PIEZO1	0.037845	0.371868	15	0.384615
3	BYL719	26	41	0.634146	0.430414	0.8	0.769231	25	TMEM184A	0.00882302	0.430414	25	0.609756
5	BYL719 + LJM716	27	39	0.692308	0.242872	0.735294	0.925926	34*	LSR	0.0600906	0.331646	33	0.846154
6	CGM097	11	36	0.305556	-0.13484	0.166667	0.0909091	6*	USP19	0.00560224	0.533002	4	0.111111
7	CLR457	28	40	0.7	-0.0228755	0.692308	0.642857	26*	CTSA	0.0213252	0.404762	28	0.7
8	HDM201	12	39	0.307692	-0.225374	0	0	4*	WDR33	0.00562714	0.486834	8	0.205128
10	LEE011	24	41	0.585366	-0.703216	0.0769231	0.0416667	13*	LOC728888	0.0280986	0.362726	10	0.243902
15	LKA136	14	39	0.358974	-0.216025	0	0	3*	ANKRD36C	0.0121701	0.451754	4	0.102564
17	binimetinib	27	41	0.658537	0.397236	0.882353	0.555556	17	CEACAM3	0.0183209	0.397236	17	0.414634
29	cetuximab	16	40	0.4	0.589256	0.9	0.5625	10	ACR	0.00033335	0.589256	10	0.25
31	CKX620	29	38	0.763158	-0.370189	0.588235	0.344828	17*	CDC42EP1	0.130459	0.280561	18	0.473684
32	encorafenib	12	40	0.3	-0.104828	0	0	1*	IGSF3	0.00541635	0.509175	4	0.1
34	LFW527 + binimetinib	16	31	0.516129	0.474342	1	0.375	6	KAT6B	0.017674	0.474342	6	0.193548
* cases that have number of predicted responsive in all folds different to the number of PDXs have mutated marker gene → the marker gene is not stable among all folds, in some certain folds the gene with lowest p-value is a different gene
NB: MCC, PR, RC and Nresp are calculated by LOOCV as explained in the Methods section of the paper
Legend
BRCA	Breast Cancer
CRC	ColorRectal Cancer
S	Number of Sensitive PDXs for the corresponding treatment
T	Total number of PDXs tested against the corresponding treatment
MCC	Matthews Correlation Coefficient
PR	Precision
RC	Recall
Nresp	Number of PDXs that are predicted responsive for the corresponding treatment using the single-gene marker

## Sheet: Best RF_predictors
ID	Treatment_Name	S	T	Reponse Rate (S/T)	RF-OMC MCC	RF-all MCC	RF-OMC PR	RF-all PR	RF-OMC RC	RF-all RC	RF-OMC F1 score	RF-all F1 Score	RF-OMC BestProf	RF-all BestProf	RF-OMC #features	RF-all #features	Selected features
BRCA
1	BGJ398	14	38	0.368421	0.410001	0.0642931	0.588235	0.5	0.714286	0.0714286	0.645161	0.125	SNV	GEX	2	22665	KIF20B, SIPA1L3
2	BKM120	30	38	0.789474	0.131158	0	0.821429	0.789474	0.733333	1	0.793103	0.882353	SNV	CN	3	23853	FOXC1, IGSF3, TLR6
3	BYL719	24	38	0.631579	0.382668	0.191068	0.74537	0.720779	0.833333	0.625	0.792157	0.674242	GEX	SNV	6	15232	PPP1R13B, NEK6, EHD1, HIP1R, CCDC85C, CCNK
5	BYL719 + LJM716	33	38	0.868421	-0.0558291	0	0.857143	0.868421	0.727273	1	0.786885	0.929577	SNV	SNV	2	15232	NCOA3, ZFHX3
6	CGM097	12	38	0.315789	0.190534	0.241989	0.454545	NA	0.416667	0.0833333	0.434783	NA	CN	GEX	8	22665	OR1D4, LOC728392, ADCYAP1R1, C7orf41, JAZF1, MIS12, SMG6, CRHR2
7	CLR457	27	38	0.710526	0.382047	0	0.8	0.710526	0.888889	1	0.842105	0.830769	CNA	GEX	2	22665	NUDT11, TBP
8	HDM201	14	38	0.368421	0.208051	0.395909	0.585714	0.816667	0.285714	0.285714	0.390476	0.444444	SNV	SNV	2	15232	ADAMTS7, RPS17L
9	INC424	14	37	0.378378	0.412202	0.180633	0.6125	0.6	0.714286	0.214286	0.645161	0.315789	SNV	GEX	10	22665	NR1H2, PCDHB7, EP400, NBPF9, GOLGB1, MAGI1, SF3B3, VWF, KIF20B, ARID1A
10	LEE011	23	38	0.605263	0.280442	0.0113501	0.684113	0.605556	0.869565	0.478261	0.761974	0.536585	SNV	CNA	9	21534	VWA1, GSTM1, NUDT11, HUWE1, POTEF, STAG3, VPS13A, POLR2J2, AMH
15	LKA136	12	38	0.315789	0.482382	0	0.75	NA	0.5	0	0.6	NA	SNV	GEX	3	22665	NR1H2, TLK2, CTSA
16	LLM871	23	38	0.605263	0.19005	0.250961	0.66092	0.678571	0.782609	0.826087	0.72	0.745098	CN	CN	23853	23853	All available genes
17	binimetinib	22	38	0.578947	0.599112	0.557211	0.784722	0.709677	0.931818	1	0.854103	0.830189	GEX	GEX	14	22665	CRB3, NDUFA1, MPG, ECI1, ING2, KIF9, TSTD1, FAM100A, TCEAL3, HAGH, PEX11G, SNORA72, SNORA70, PIN1
18	paclitaxel	26	38	0.684211	0.493965	0.178463	0.821429	0.705882	0.884615	0.961538	0.851852	0.813062	SNV	CN	2	23853	MUC20, UPK3BL
CRC
2	BKM120	25	39	0.641026	-0.0723403	0.185164	0.62549	0.666667	0.8	0.96	0.701387	0.786885	GEX	CN	8	23853	BDKRB2, ZNF607, CDK1, EXT2, TMPO, RPL4, GNB2L1, ZNF808
3	BYL719	26	41	0.634146	0.243453	0.158179	0.725385	0.645161	0.692308	0.769231	0.707108	0.701754	CN	CN	14	23853	HIBADH, TAX1BP1, CBX3, HNRNPA2B1, NFE2L3, SNX10, NPVF, RNU6.16, CYCS, MIR148A, C7orf31, OSBPL3, IRF6, C1orf74
5	BYL719 + LJM716	27	39	0.692308	0.379203	0.177667	0.796552	0.727273	0.814815	0.888889	0.803846	0.8	CNA	CN	2	23853	AQR, FLNC
6	CGM097	11	36	0.305556	0.43108	0.365636	0.8	1	0.363636	0.181818	0.5	0.307692	GEX	GEX	3	22665	NONO, RBBP7, CDK4
7	CLR457	28	40	0.7	0.169837	0.2446	0.741935	0.717949	0.821429	1	0.779661	0.835821	CN	GEX	19	22665	RAP1GDS1, PDLIM5, ANK1, ARSJ, HPGDS, SMARCAD1, BMPR1B, FAM13A.AS1, ANK2, C4orf37, C4orf22, AP3M2, PLAT, DKK2, ALPK1, AP1AR, C4orf21, C4orf32, LARP7
8	HDM201	12	39	0.307692	0.22727	0.000708599	0.535714	0.285714	0.25	0.166667	0.410526	0.210526	SNV	CN	6	23853	WDR33, CEACAM7, NEMF, POLDIP2, BMP2K, PER1
10	LEE011	24	41	0.585366	0.300144	0.253048	0.661458	0.695652	0.875	0.666667	0.756818	0.680851	SNV	CN	4	23853	ANKRD12, BCL9, ABCB8, HERC1
15	LKA136	14	39	0.358974	0.151186	0.277613	0.461538	0.625	0.428571	0.357143	0.444444	0.444664	CN	CN	2	23853	MICALCL, OR52E8
17	binimetinib	27	41	0.658537	-0.049094	0	0.642857	0.658537	0.666667	1	0.654545	0.794118	CN	SNV	2	15232	POLR2J2, UPK3BL
29	cetuximab	16	40	0.4	0.470073	0.392702	0.619048	0.644958	0.8125	0.59375	0.702703	0.622581	SNV	CN	4	23853	ACR, DENND4B, NOTCH1, RPL22
31	CKX620	29	38	0.763158	0.0664474	0	0.771429	0.763158	0.931034	1	0.84375	0.865672	CN	SNV	6	15232	LIMS3.1, PPIAL4A, PPIAL4C.1, PPIAL4B, FAM91A2, LOC728855
32	encorafenib	12	40	0.3	0.00809947	0.169031	0.309524	0.36	0.166667	0.75	NA	0.486486	CN	SNV	7	15232	MIR4493, BSX, C11orf63, CRTAM, UBASH3B, ME3, CCDC15
34	LFW527 + binimetinib	16	31	0.516129	0.166553	0.225	0.568323	0.625	0.8125	0.625	0.666667	0.625	SNV	CN	4	23853	ASXL1, DHX16, KIAA1199, SLC28A2
Note 1: MCC, PR and RC are median values calculated 10 LOOCV runs as explained in the Methods section of the paper. MCCs are shown in Figure 2.
Note 2: Figures 3-5 show the results for one of the 10 runs and hence might not necessarily display exactly the same MCC as above.
Legend
BRCA	Breast Cancer
CRC	ColorRectal Cancer
S	Number of Sensitive PDXs
T	Total number of PDXs tested against the corresponding treatment
RF	Random Forest
RF-OMC	Random Forest with Optimal Model Complexity
RF-all	Random Forest using all available features
MCC	Matthews Correlation Coefficient
PR	Precision
RC	Recall
BestProf	The best profile for that method (either RF-OMC or RF-all)
SNV	Single Nucleotide Variants
CNA	Copy Number Alterations
CN	Copy Number (real values)
GEX	Gene expression levels

## Sheet: Performance_all_cases_BRCA
Treatment	S	T	RF-OMC MCC				RF-all MCC
			SNV	CNA	CN	GEX	SNV (15232)	CNA (21534)	CN (23853)	GEX (22665)
BGJ398	14	38	0.41	-0.16	0.05	-0.14	-0.11	0.06	-0.18	0.06
BKM120	30	38	0.13	-0.92	0	0	-0.2	-0.11	0	0
BYL719	24	38	-0.02	0.25	0.1	0.38	0.19	-0.28	-0.08	0.14
BYL719 + LJM716	33	38	-0.06	-0.09	-0.13	-0.06	0	-0.06	0	0
CGM097	12	38	-0.28	-0.01	0.19	0.05	0.04	-0.28	-0.16	0.24
CLR457	27	38	0.06	0.38	-0.08	0.24	-0.15	-0.18	-0.1	0
HDM201	14	38	0.21	-0.01	-0.04	-0.17	0.4	0.23	0.18	-0.03
INC424	14	37	0.41	0.06	-0.54	0.03	-0.13	-0.26	-0.27	0.18
LEE011	23	38	0.28	-0.46	-0.26	0.03	-0.2	0.01	0	-0.19
LKA136	12	38	0.48	0.48	-0.21	-0.29	-0.1	-0.29	-0.02	0
LLM871	23	38	-0.61	-0.37	0.19	-0.24	-0.18	-0.11	0.25	0.04
binimetinib	22	38	0.01	-0.12	-0.37	0.6	0.1	0.19	-0.13	0.56
paclitaxel	26	38	0.49	0.38	0.11	-0.26	-0.07	-0.09	0.18	0
Legend
BRCA	Breast Cancer
S	Number of Sensitive PDXs
T	Total number of PDXs tested against the corresponding treatment
RF	Random Forest
RF-OMC	Random Forest with Optimal Model Complexity
RF-all	Random Forest using all available features
SNV	Single Nucleotide Variants
CNA	Copy Number Alterations
CN	Copy Number (real values)
GEX	Gene expression levels
MCC	Matthews Correlation Coefficient

## Sheet: Performance_all_cases_CRC
Treatment	S	T	RF-OMC MCC				RF-all MCC
			SNV	CNA	CN	GEX	SNV (15232)	CNA (21534)	CN (23853)	GEX (22665)
BKM120	25	39	-0.28	-0.66	-0.23	-0.07	-0.02	-0.34	0.19	-0.12
BYL719	26	41	0.16	-0.08	0.24	-0.25	-0.12	-0.23	0.16	0.06
BYL719 + LJM716	27	39	-0.02	0.38	-0.09	0.21	0	0	0.18	-0.11
CGM097	11	36	-0.44	-0.06	0.17	0.43	-0.01	-0.14	0.26	0.37
CLR457	28	40	-0.29	-0.04	0.17	0.02	0	0	-0.08	0.24
HDM201	12	39	0.23	-0.24	-0.07	0.05	-0.15	-0.06	0	0
LEE011	24	41	0.3	-0.1	0.12	-0.07	-0.07	-0.23	0.25	0.09
LKA136	14	39	-0.49	0	0.15	-0.17	-0.03	-0.12	0.28	0.07
binimetinib	27	41	-0.55	-0.47	-0.05	-0.27	0	-0.31	-0.19	0
cetuximab	16	40	0.47	0.32	0.05	0.1	0.39	0.39	0.39	0.36
CKX620	29	38	-0.42	-0.04	0.07	0.01	0	-0.19	0	0
encorafenib	12	40	-0.25	-0.39	0.01	-0.16	0.17	0.11	0.02	0
LFW527 + binimetinib	16	31	0.17	0.09	0.11	-0.16	0.1	-0.03	0.23	0.1
Legend
CRC	Colorectal cancer
S	Number of Sensitive PDXs
T	Total number of PDXs tested against the corresponding treatment
RF	Random Forest
RF-OMC	Random Forest with Optimal Model Complexity
RF-all	Random Forest using all available features
SNV	Single Nucleotide Variants
CNA	Copy Number Alterations
CN	Copy Number (real values)
GEX	Gene expression levels
MCC	Matthews Correlation Coefficient
